# Supplementary material
Source: PubMed Central journal article supplement (PMC7022375)

## Supplementary methods

### *Patients and age-matched healthy donor materials*

Peripheral blood mononuclear cells (PBMCs) were isolated using Ficoll-Paque PLUS (VWR). Isolated PBMCs were cryopreserved under liquid nitrogen. CAR T cell infusion products were generated from R/R CLL patients as previously described<sup>1</sup>. In short, autologous T cells were obtained by leukapheresis and stimulated with CD3 and CD28 antibody coated paramagnetic polystyrene beads prior to transduction with a lentiviral vector encoding the anti-CD19 4-1BBz CAR (Novartis, Tisagenlecleucel). Subsequently transduced cells were expanded for 9-11 days.

### *Flow Cytometry*

The following metabolic dyes (all from Thermo Fisher Scientific) were used to determine metabolic parameters: Mitochondrial reactive oxygen species (ROS) (MitoSOX), Mitochondrial mass (Mitotracker Green), Mitochondrial membrane potential (Mitotracker Orange), Glucose uptake (2-NBDG), and total cellular ROS (DCFDA). Cells were incubated with metabolic dyes in PBS for 15 minutes at 37° C at a final concentration of  $3 \times 10^6$  cells per ml. For T cell proliferation assays, PBMCs were labeled with cell trace violet (CTV) according to manufacturer's instructions (Thermo Fisher Scientific). After labeling the cells with metabolic dyes or CTV, cells were washed with PBS supplemented with 0.5% BSA and 0.02% Sodium Azide and stained for cell surface markers using fluorescently conjugated antibodies for 20 minutes on ice. The following antibodies were used (also see supplementary table 1): CD3, CD4, CD8, CD25, CD27, CD28, CD38, CD45RA, CD45RO, CD71, CD95, CD107a, PD-1, CCR7, LAG-3, CAR<sup>3</sup>, GLUT1, and GLUT1 RBD GFP (described previously<sup>4-6</sup>). The BD Biosciences fixation and permeabilization kit (Cat. No. 554714) was used to fix cells and subsequently stain intracellular proteins using conjugated or unconjugated antibodies. Intracellular proteins were either stained directly by using ERR $\alpha$ , HIF-1 $\alpha$ , HO-1, NRF-2, IFN- $\gamma$ , TNF- $\alpha$ , pAKT(T308), pAKT(S473), pS6(S240/244), p4E-BP1(T37/T46), pPI3K(Y458/Y199) antibodies, or incubated with an unconjugated primary antibody against SOD1, SOD2, GLUT1, or PGC1- $\alpha$ , and subsequently stained with anti-rabbit PE, with

exception of PGC1- $\alpha$  which was stained using anti-mouse AF488. To separate live cells from dead cells during FACS, Fixable Viability Dye 780, Fixable Viability Dye 506, Live/Dead Aqua or 7AAD (all Thermo Fisher Scientific) were used according to manufacturer's instructions. Following staining, cells were washed in a solution of 0.5% BSA, 0.02% sodium azide in PBS, and acquired on a BD Fortessa or FACS Canto II flow cytometer. Results were analyzed using FlowJo 10.4 (BD Biosciences).

#### *Extracellular flux analysis*

Seahorse XF96 or XFp extracellular flux analyzers (Agilent) were used to analyze sorted CD8<sup>+</sup> T cells, as previously described<sup>7</sup>. In short, cell plates were PDL-coated and assay medium was prepared (non-buffered RPMI-1640 (Sigma) containing glucose (25 mM), glutamine (2 mM, Thermo Fisher Scientific), and sodium pyruvate (1 mM, Thermo Fisher Scientific)). To analyze oxygen consumption rate (OCR), spare respiratory capacity (SRC) and basal extracellular acidification rate (ECAR), a mitochondrial stress test was performed using the following compounds (final concentrations between brackets): oligomycin (1  $\mu$ M), FCCP (1.5  $\mu$ M), Rotenone (100 nM) and Antimycin A (1  $\mu$ M). The Seahorse injection protocol was performed as described previously<sup>7</sup>. Spare respiratory capacity (SRC) was calculated as the ratio between maximum and basal OCR. Results were analyzed using Seahorse Wave version 2.4.

Supplementary Table 1: Antibodies used for flow cytometry

| <b>Target antigen</b> | <b>Fluorochrome</b> | <b>manufacturer</b> | <b>Cat#</b> |
|-----------------------|---------------------|---------------------|-------------|
| CD3                   | AF700               | eBioscience         | 56-0038-82  |
| CD3                   | V500                | BD Biosciences      | 561416      |
| CD4                   | PE-Cy7              | BD Biosciences      | 348809      |
| CD4                   | APC                 | BD Biosciences      | 555349      |
| CD4                   | AF594               | BioLegend           | 300544      |
| CD4                   | BV605               | BD Biosciences      | 562658      |
| CD8                   | V450                | BD Biosciences      | 580347      |
| CD25                  | APC                 | BD Biosciences      | 340907      |
| CD25                  | BV786               | BD Biosciences      | 563700      |
| CD27                  | BUV397              | BD Biosciences      | 563816      |
| CD27                  | PerCP-eFl710        | eBioscience         | 46-0279-42  |
| CD28                  | BUV737              | BD Biosciences      | 564438      |

|                  |              |                                   |                 |
|------------------|--------------|-----------------------------------|-----------------|
| CD38             | BUV395       | BD Biosciences                    | 563811          |
| CD38             | PE-Cy7       | BD Biosciences                    | 335825          |
| CD45RA           | BV650        | BD Biosciences                    | 563953          |
| CD45RO           | BV570        | BioLegend                         | 304225          |
| CD71             | BV786        | BD Biosciences                    | 563768          |
| CD107a           | PE-Cy7       | BD Biosciences                    | 561348          |
| CD95             | BV510        | BioLegend                         | 305639          |
| PD-1             | PE-Cy7       | BD Biosciences                    | 561272          |
| CAR              | AF647        | See reference <sup>3</sup>        | N/A             |
| CCR7             | BV711        | BioLegend                         | 353227          |
| ERR $\alpha$     | AF647        | BioTechne                         | NBP1-47254AF647 |
| GLUT1            | AF700        | BioTechne                         | FAB1418N        |
| GLUT1            | PE           | R&D Biosystems                    | FAB1418P        |
| GLUT1            | unconjugated | Abcam                             | ab652           |
| GLUT1-RBD        | GFP          | Metafora Biosystems               | Glut1-G100      |
| HIF-1 $\alpha$   | AF488        | BioLegend                         | 359708          |
| HO-1             | PE           | Enzo LifeSciences                 | ADI-OSA-111PE-F |
| IFN- $\gamma$    | BUV395       | BD Biosciences                    | 563563          |
| LAG-3            | Pe-Cy7       | BioLegend                         | 369310          |
| Mouse IgG        | AF488        | Life Technologies                 | A21042          |
| NRF-2            | AF488        | Abcam                             | ab194984        |
| PD-1             | V450         | BD Biosciences                    | 562516          |
| PGC1 $\alpha$    | unconjugated | Abcam                             | ab77210         |
| Rabbit IgG       | PE           | Southern Biotechnology Associates | 4010-09S        |
| SOD1             | unconjugated | Cell Signalling                   | ab20926         |
| SOD2             | unconjugated | Cell Signalling                   | 13141S          |
| TNF- $\alpha$    | AF700        | BD Biosciences                    | 557996          |
| pAKT(T308)       | Unconjugated | Cell Signalling                   | 2965S           |
| pAKT(S473)       | Unconjugated | Cell Signalling                   | 4060S           |
| pS6(S240/244)    | unconjugated | Cell Signalling                   | 5364L           |
| p4E-BP1(T37/T46) | unconjugated | Cell Signalling                   | 2855S           |
| pPI3K(Y458/Y199) | unconjugated | Thermo Fisher Scientific          | MA5-28028       |

Supplementary Table 2: Primers used for qPCR

| Primer               | Direction | Sequence (5'-3')     | Species |
|----------------------|-----------|----------------------|---------|
| mtDNA (ND-1)         | Forward   | TCATATTATGGCCAAGGGTC | Human   |
| mtDNA (ND-1)         | Reverse   | CTCCTTTAACCTCTCCACCC | Human   |
| nDNA (beta globulin) | Forward   | TTTTCCACCCTTAGGCTG   | Human   |
| nDNA (beta globulin) | Reverse   | CTCACTCAGTGTGGCAAAG  | Human   |
| 18S                  | Forward   | CGGCTACCACATCCAAGGAA | Human   |
| 18S                  | Reverse   | GCTGGAATTACCGCGGCT   | Human   |
| GLUT1                | Forward   | AGGTGATCGAGGAGTTCTAC | Human   |
| GLUT1                | Reverse   | TCAAAGGACTTGCCCAGTTT | Human   |

## Supplementary References

1. Porter DL, Hwang WT, Frey NV, et al. Chimeric antigen receptor T cells persist and induce sustained remissions in relapsed refractory chronic lymphocytic leukemia. *Sci Transl Med*. 2015;7(303):303ra139.
2. Hallek M, Cheson BD, Catovsky D, et al. Guidelines for the diagnosis and treatment of chronic lymphocytic leukemia: a report from the International Workshop on Chronic Lymphocytic Leukemia updating the National Cancer Institute-Working Group 1996 guidelines. *Blood*. 2008;111(12):5446-5456.
3. Jena B, Maiti S, Huls H, et al. Chimeric antigen receptor (CAR)-specific monoclonal antibody to detect CD19-specific T cells in clinical trials. *PLoS One*. 2013;8(3):e57838.
4. Manel N, Kim FJ, Kinet S, Taylor N, Sitbon M, Battini JL. The ubiquitous glucose transporter GLUT-1 is a receptor for HTLV. *Cell*. 2003;115(4):449-459.
5. Cretenet G, Clerc I, Matias M, et al. Cell surface Glut1 levels distinguish human CD4 and CD8 T lymphocyte subsets with distinct effector functions. *Sci Rep*. 2016;6:24129.
6. Kinet S, Swainson L, Lavanya M, et al. Isolated receptor binding domains of HTLV-1 and HTLV-2 envelopes bind Glut-1 on activated CD4+ and CD8+ T cells. *Retrovirology*. 2007;4:31.
7. van der Windt GJ, Chang CH, Pearce EL. Measuring Bioenergetics in T Cells Using a Seahorse Extracellular Flux Analyzer. *Curr Protoc Immunol*. 2016;113:3 16B 11-13 16B 14.

## Supplemental Fig. 1:

PBMCs from CLL patients and healthy donors (HD) were analyzed directly after thawing (E), or stimulated using anti-CD3/CD28 antibodies for 2 (A-C, E-G, I, J) or 5 (D) days. (A) Gating strategy. (B) Relative increase of PD-1 expression. (C) IFN- $\gamma$  and TNF- $\alpha$  expression by CD8<sup>+</sup> T cells (n=12). (D) CD8<sup>+</sup> T cells were analyzed for proliferation (n=8). (E) GLUT1 expression in CD8<sup>+</sup> T cells measured by a conjugated antibody (n=12). (F) Relative increase of GLUT-1 expression. (G) CLL derived CD8<sup>+</sup> T cell response to stimulation was determined to be “good” (% 2-NBDG hi > 40% of total CD8<sup>+</sup> T cells) or poor (% 2-NBDG hi < 40% of total CD8<sup>+</sup> T cells) based on data from Fig. 1E, and white blood cell count and %CLL were compared. (H) Expression of CD28 (n=4) and CD3 (CLL, n=21; HD, n=17) on CD8<sup>+</sup> cells. (I) Glucose uptake by CD8<sup>+</sup> T cells (CLL, n=23; HD, n=20; unstimulated control and anti-CD3/CD28 data are the same as in Fig. 1E). (J) Surface expression of GLUT1 by CD8<sup>+</sup> T cells using the GLUT1 RBD GFP construct (CLL, n=6; HD, n=4; unstimulated control and anti-CD3/CD28 data are the same as in Fig. 1D), and activated (CD25<sup>+</sup>) CD8<sup>+</sup> T cells were analyzed for GLUT1 surface expression using the GLUT1 RBD GFP construct (CLL, n=6; HD, n=4). Normality was determined by a D’Agostino & Pearson normality test. The *p* value was calculated by a Mann-Whitney test (C, E-G, J), an unpaired T-test (D, H, I), a Welch’s test (B, C). Data are presented as mean  $\pm$  SEM, \**p*<0.05; \*\**p*<0.005; \*\*\**p*<0.0005.

**Supplemental fig. 2:**

PBMCs from CLL patients and healthy donors (HD) were stimulated using anti-CD3/CD28 antibodies and analyzed after 2 days. CD8 T cells of HD and CLL were analyzed for the following intracellular proteins; **(A)** pAKT(S473), **(B)** pPI3K(Y458/Y199), **(C)** pS6(S240/S244), **(D)** pAKT(T308), **(E)** p4E-BP1(T37/T46), **(F)** HIF-1 $\alpha$ . Normality was determined by a D'Agostino & Pearson normality test. The  $p$  value was calculated by a Mann-Whitney test (A-F). Data are presented as mean  $\pm$  SEM, \* $p$ <0.05; \*\* $p$ <0.005.

**Supplemental fig. 3:**

**(A)** Representative seahorse plot showing oxygen consumption rate (OCR) for 1 CLL patient and 1 healthy donor (sorted CD8 T cells). **(B)** Graphs showing proton leak, maximum respiration, and ATP production (CLL, n=6-7; HD, n=5-7). **(C)** Relative MFI of total cellular ROS sensor DCFDA measured directly after thawing and depleting CD19<sup>+</sup> cells (CLL, n=6; HD, n=6). **(D)** Gating strategy and representative plots for MitoSOX and Mitotracker Orange analyses. **(E)** Representative FACS plots showing the gating strategy (top plots showing general gating for 1 healthy donor). Relative values were obtained by normalizing to an unrelated control sample (C). Normality was determined by a D'Agostino & Pearson normality test. The  $p$  value was calculated by a Wilcoxon Signed Rank test (B), or an unpaired T test (C). Data are presented as mean  $\pm$  SEM.

**Supplemental Fig. 4:**

**(A)** Representative dot plots showing the gating strategy to separate CD3<sup>+</sup> CD8<sup>+</sup> naïve cells (CD27<sup>+</sup>CD45RA<sup>+</sup>CCR7<sup>+</sup>CD95<sup>-</sup>), memory stem cells (CD27<sup>+</sup>CD45RA<sup>+</sup>CCR7<sup>+</sup>CD95<sup>+</sup>), memory cells (CD27<sup>+</sup>CD45RA<sup>-</sup>), and effector cells (CD27<sup>-</sup>CD45RA<sup>+/+</sup>). **(B)** Induction of mitochondrial mass calculated by dividing the MFI of Mitotracker green of stimulated cells by MFI of unstimulated cells, similar experiment as in Fig 5C, but with larger cohort (CLL, n=16; HD, n=17). Normality was determined by a

D'Agostino & Pearson normality test. The  $p$  value was calculated by a Mann-Whitney test (B). Data are presented as mean  $\pm$  SEM.

**Supplemental Fig. 5:**

Representative dot plots showing the gating strategy to separate CD3<sup>+</sup>CD8<sup>+</sup>CAR<sup>+</sup> effector (CD27<sup>-</sup>CD45RO<sup>+</sup>), and memory T cells (CD27<sup>+</sup>CD45RO<sup>+</sup>).

# Supplemental figure 1

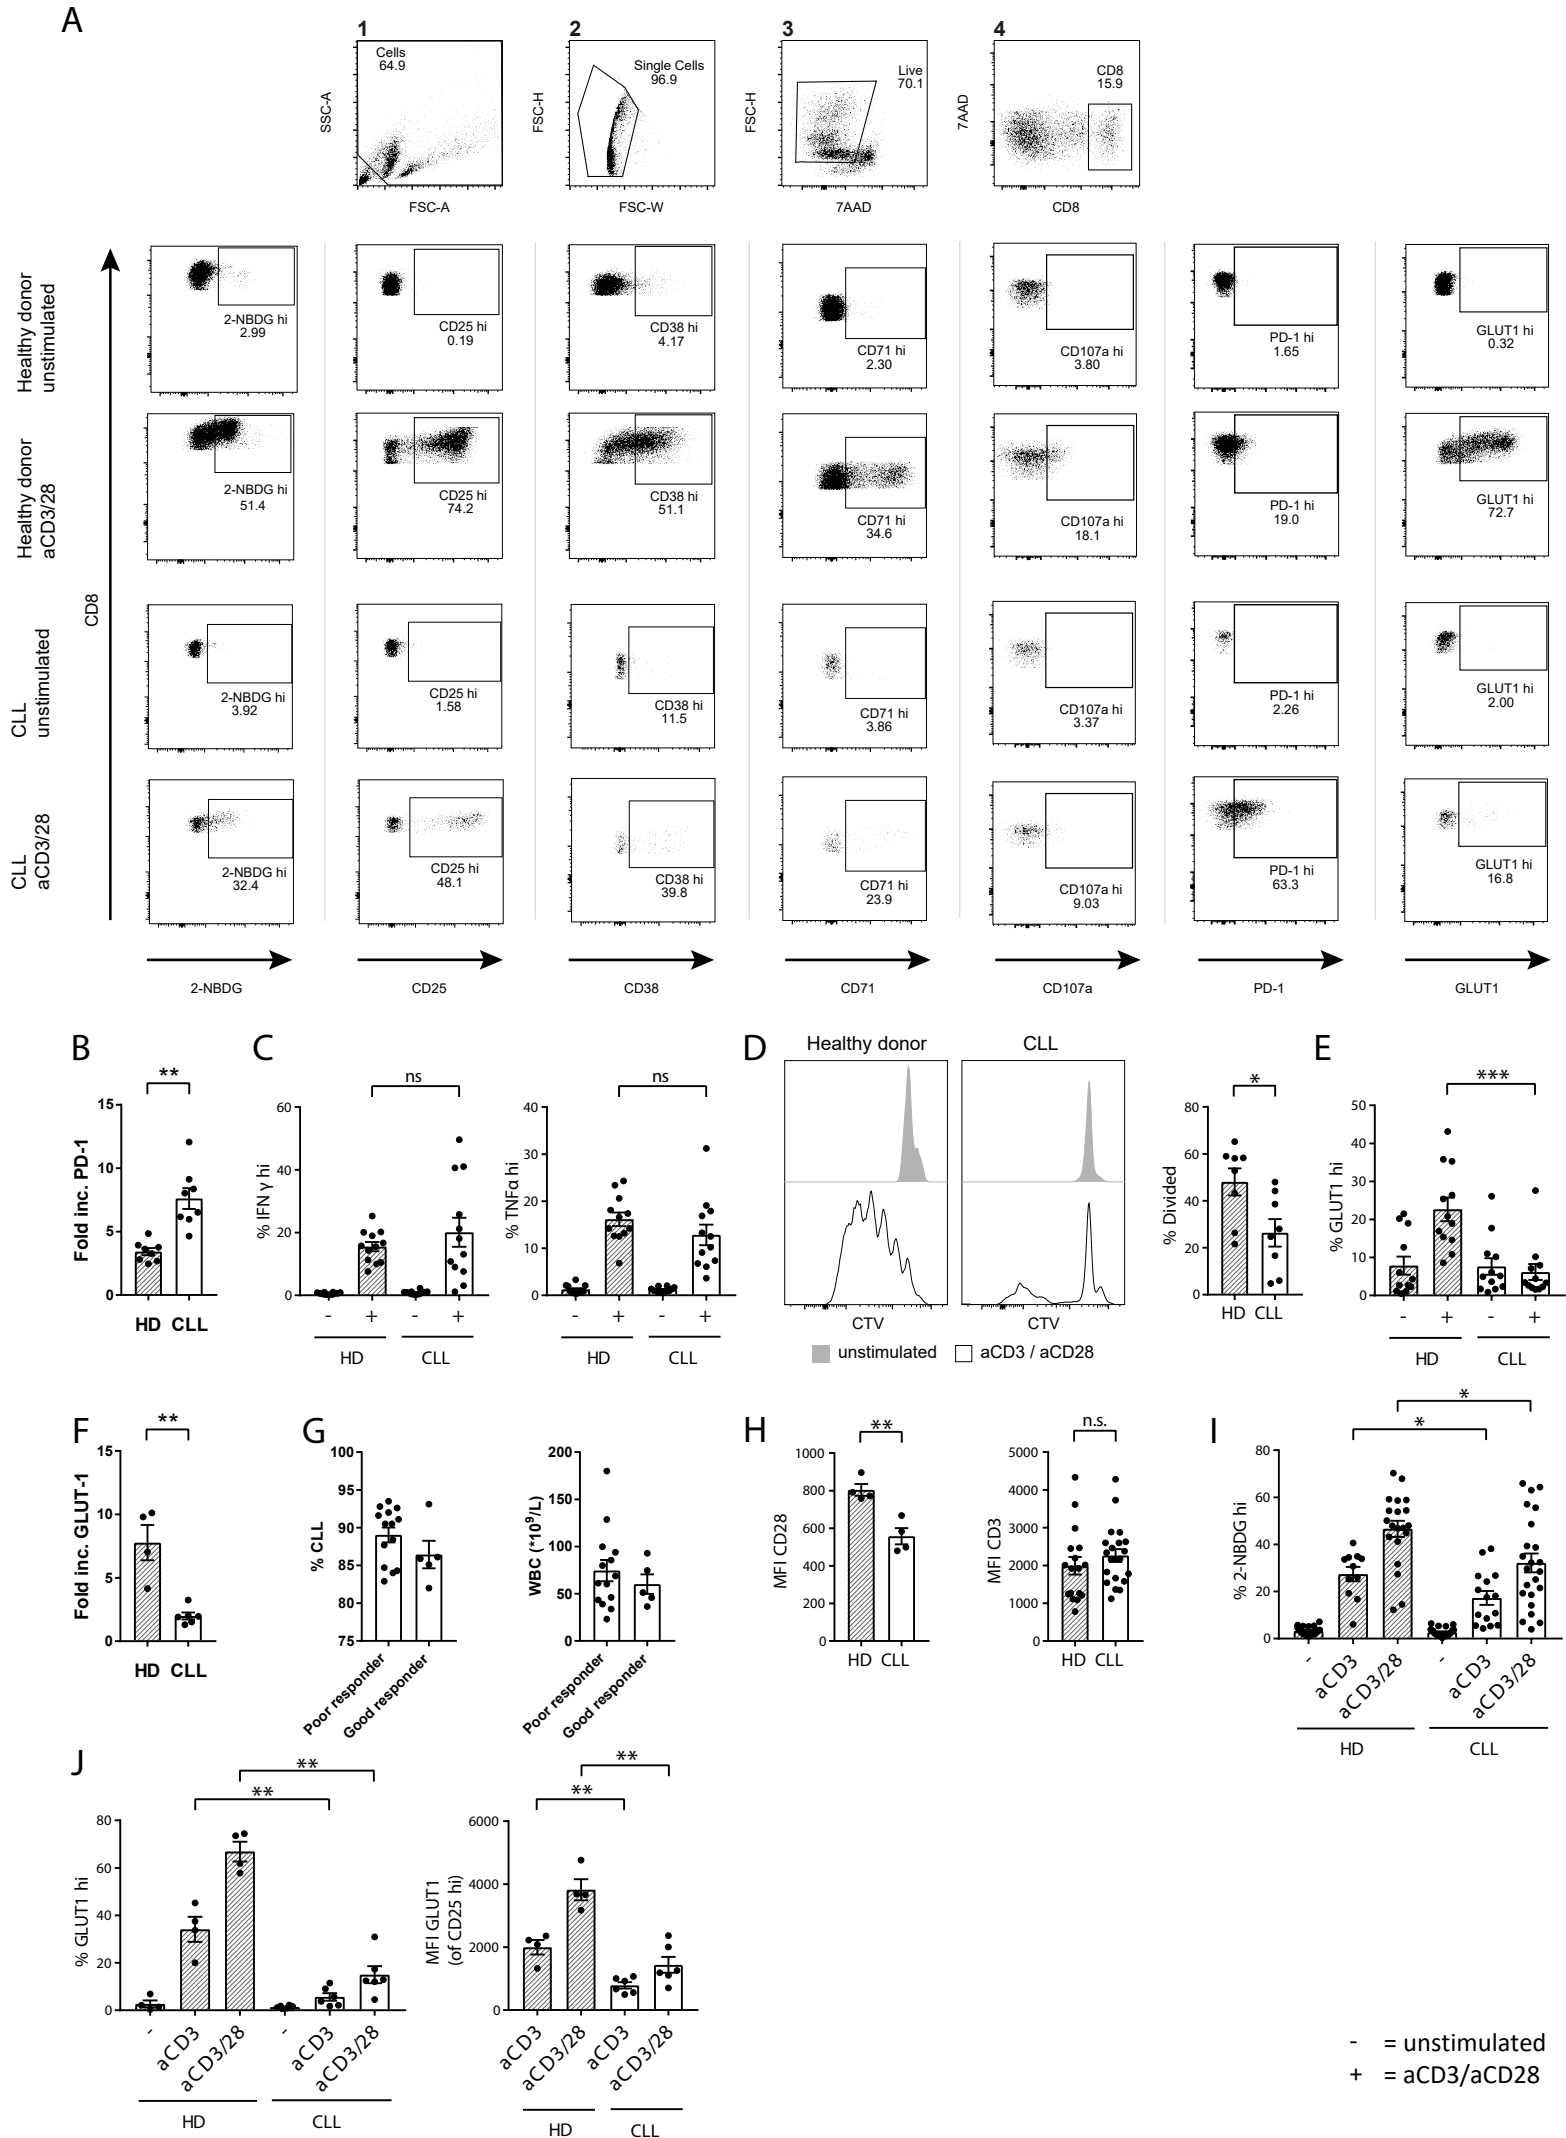

## Supplemental figure 2

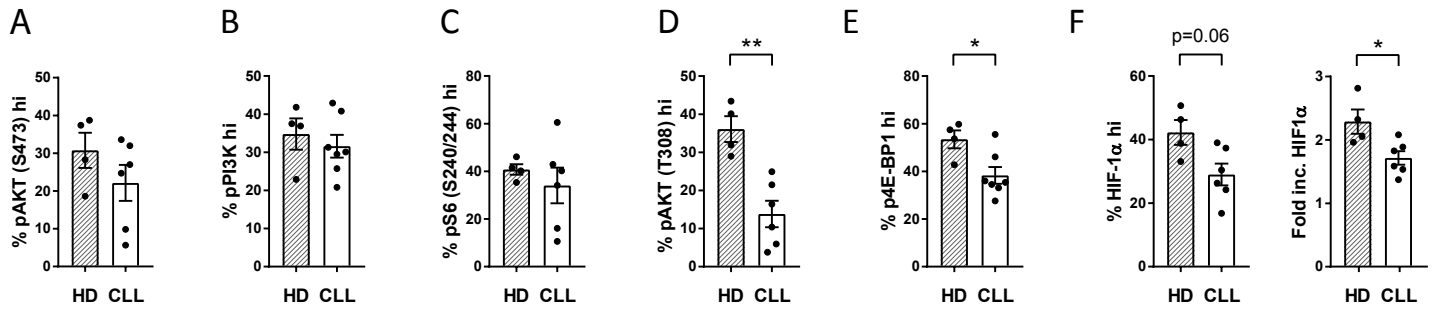



# Supplemental figure 3

**A**

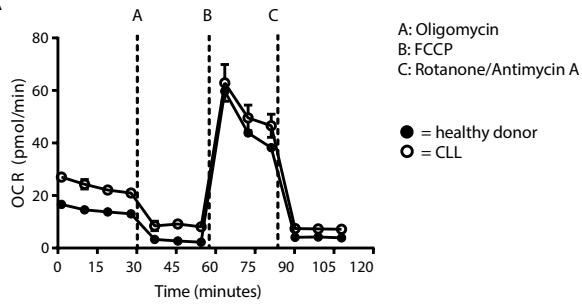

**B**

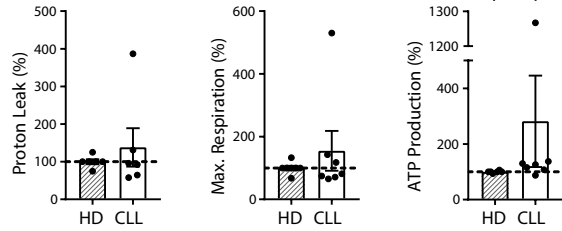

**C**

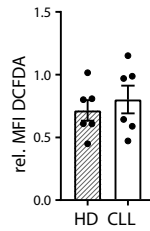

**D**

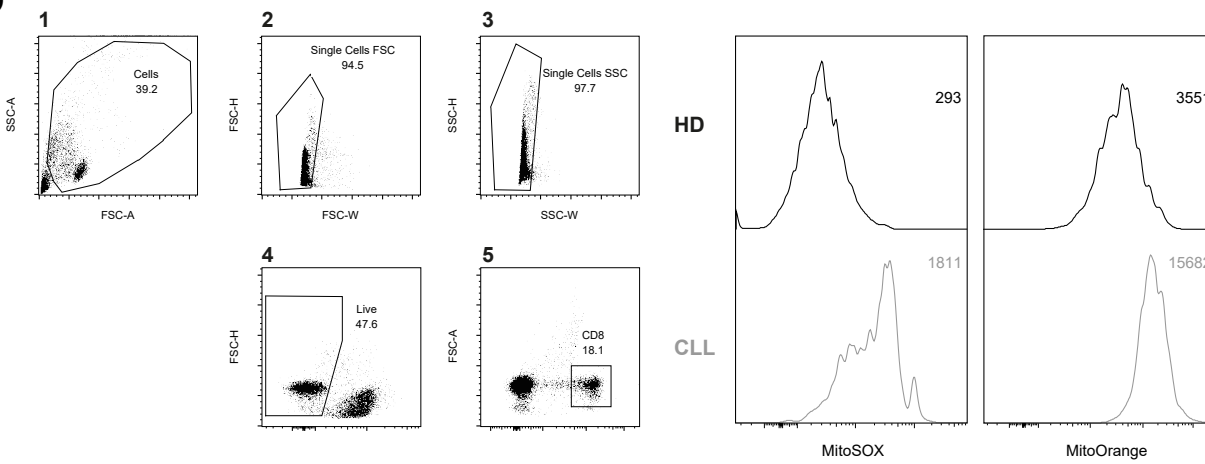

**E**

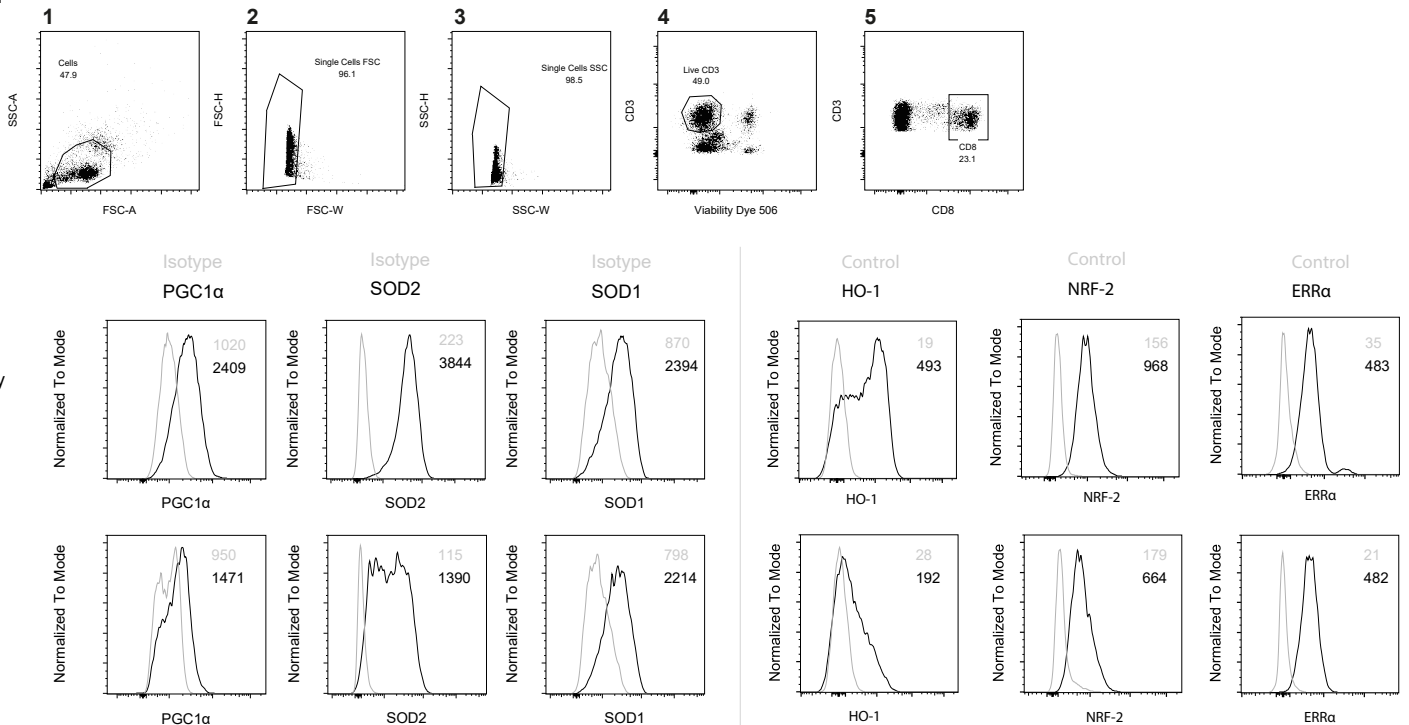

# Supplemental figure 4

## A

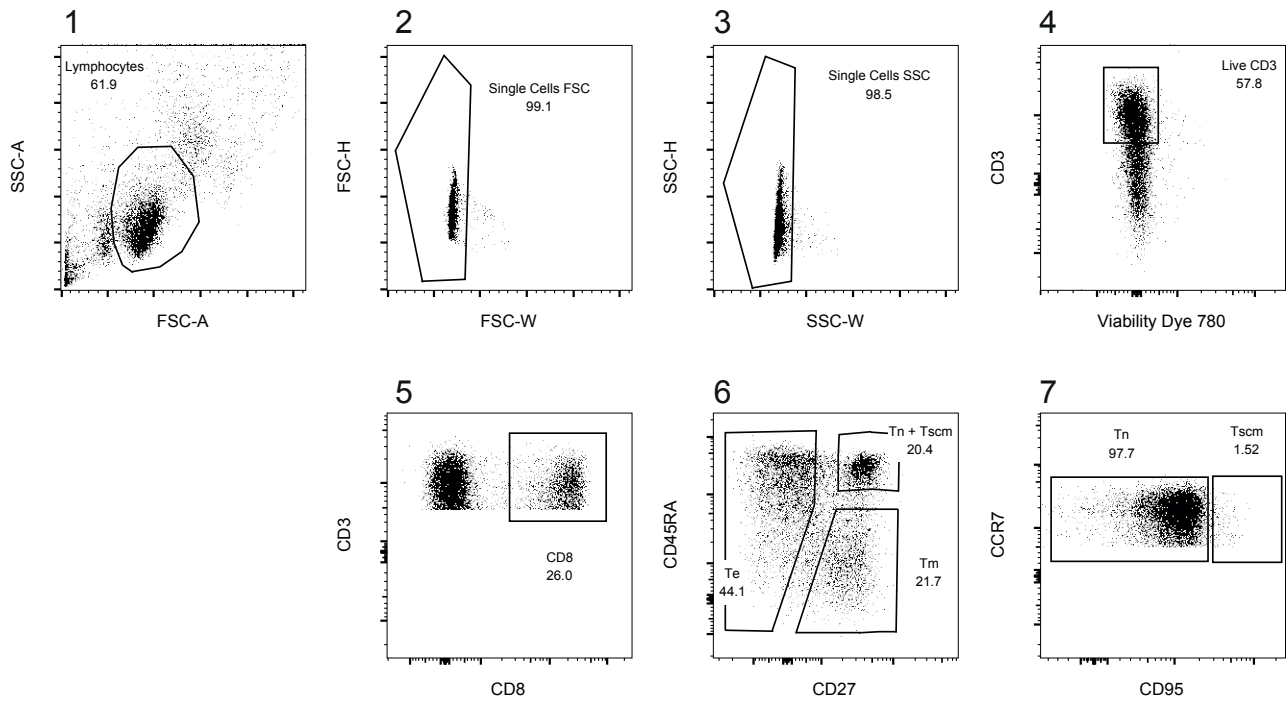

## B

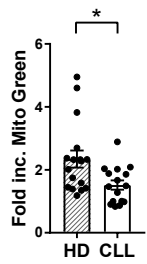

# Supplemental figure 5

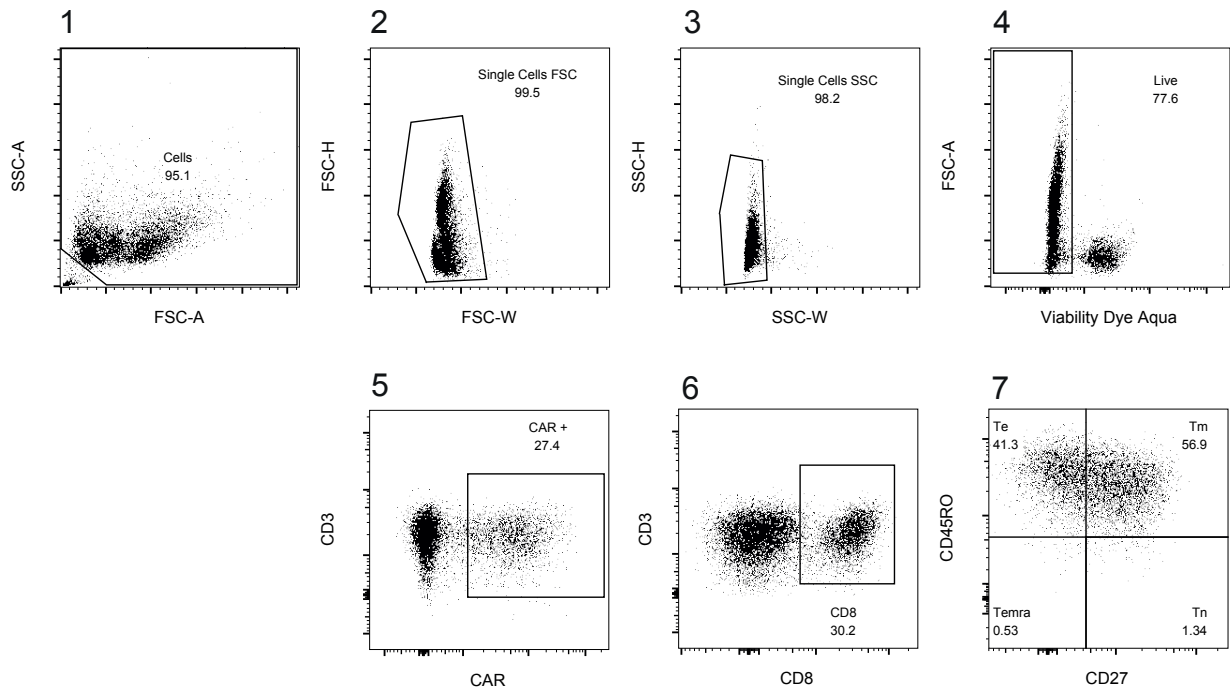

Supplement: blood885863-suppl1.pdf [file blood885863-suppl1.pdf]
